# Supplementary material
Source: PubMed Central journal article supplement (PMC5882487)
Supplement: NIHMS952100-supplement-supplemental.pdf [file NIHMS952100-supplement-supplemental.pdf]

**Supplemental Figure Legends:**

**Supplemental Figure 1.  $\alpha$ v $\beta$ 8 integrin is expressed in perivascular tumor cells in human GBM samples. (A-D);** Images of anti- $\beta$ 8 integrin immunohistochemistry stains of formalin-fixed and paraffin-embedded human non-cancerous human brain (A) and GBM sections (B-D). Note that  $\beta$ 8 integrin protein is enriched in perivascular tumor cells. **(E);** Immunoblot analysis of  $\beta$ 8 integrin protein levels in a non-cancerous brain sample (n=1) and in 11 different grade IV GBM lysates. Note that in comparison to the non-cancerous brain lysate,  $\beta$ 8 integrin protein levels are higher in most GBM samples.

**Supplemental Figure 2. Fractionation of primary GBM cells based on differential expression of  $\beta$ 8 integrin protein. (A);** Summary of percentages of cells expressing  $\beta$ 8 integrin protein ( $\beta$ 8<sup>high</sup> GBM cells) from 25 different freshly resected human tumor samples. **(B);** Representative FACS plots of  $\beta$ 8<sup>high</sup> and  $\beta$ 8<sup>low</sup> GBM cells from select freshly resected tumor samples listed in (A).

**Supplemental Figure 3. Antibody-mediated inhibition of  $\beta$ 8 integrin blocks GSC self-renewal and spheroid formation. (A, B);**  $\beta$ 8<sup>high</sup> GBM cells were treated with matching pre-immune rabbit serum (A) or antiserum directed against the  $\beta$ 8 integrin extracellular domain (B). Note that the anti- $\beta$ 8 integrin antibody treatment diminishes GBM cell growth and sphere formation. **(C);** Quantitation of sphere size after four days in culture with control serum or the anti- $\beta$ 8 integrin neutralizing antiserum (1:50 dilution). Spheres formed in the presence of the anti- $\beta$ 8 integrin are consistently smaller. **(D);** Analysis of ITGB8 mRNA expression levels in

primary human GBM cells before (CSC) and after (FCS) serum-mediated differentiation based on transcriptome sequencing of single cells (top row) and tumorigenic potential in vivo (bottom row). These data were mined from Patel et al. (2014), *Science* 344: 1396-1401.

**Supplemental Figure 4.  $\beta 8$  integrin in primary GSCs promotes tumor initiation and**

**growth in vivo. (A);** Representative FACS plot of  $\beta 8^{\text{high}}$  and  $\beta 8^{\text{low}}$  tumor cells from a freshly resected GBM sample (HBT28). **(B, C);** H&E stained and immunofluorescence images of brain sections from mice injected with  $\beta 8^{\text{high}}$  GBM cells sorted from sample HBT28. Note that  $\beta 8^{\text{high}}$  cells form large intracranial tumors with cancer cells displaying invasion along white matter and blood vessels. **(D, E);** H&E and immunofluorescence images of tumor sections from mice injected with  $\beta 8^{\text{low}}$  GBM cells fractionated from HBT28 samples. **(F);** Representative FACS plot of  $\beta 8^{\text{high}}$  and  $\beta 8^{\text{low}}$  tumor cells from freshly resected GBM sample HBT38. **(G, H);** H&E stained and immunofluorescence images of brain sections from mice injected with  $\beta 8^{\text{high}}$  GBM cells sorted from sample HBT38. Note that  $\beta 8^{\text{high}}$  cells form diffuse and invasive intracranial tumors. **(I, J);** H&E stained and immunofluorescence images from mouse brains injected with  $\beta 8^{\text{low}}$  GBM cells sorted from sample HBT38.

**Supplemental Figure 5. Immunofluorescence analysis of xenograft tumors derived from**

**$\beta 8^{\text{high}}$  GBM cells. (A-F);** Double immunofluorescence stains of  $\beta 8$  integrin-dependent GBM growth, invasion and angiogenesis in xenograft tumors (HBT28).  $\beta 8^{\text{high}}$  cells express vimentin and nestin and generate well-vascularized and invasive tumors that are interlaced with glial cells as revealed by anti-laminin stains for vascular basement membranes (A, B) anti-GFAP for astrocytes (C, D), and anti-IBA1 for microglia (E, F) double labeling.

**Supplemental Figure 6. Analysis of  $\beta 8$  integrin re-expression in  $\beta 8^{\text{low}}$  GSCs. (A);** An H&E-stained coronal section through a mouse brain harboring a tumor derived from unfractionated cells from human sample HBT32. **(B);** FACS-based fractionation of  $\beta 8^{\text{high}}$  and  $\beta 8^{\text{low}}$  human cells from HBT32 xenograft. A human-specific CD47 antibody was used in combination with anti- $\beta 8$  integrin to distinguish human and mouse cells. **(C, D);**  $\beta 8^{\text{high}}$  (C) and  $\beta 8^{\text{low}}$  (D) GBM cells fractionated from the xenograft tumor in panel A generate secondary tumors in mice. **(E-H);** Anti- $\beta 8$  integrin immunohistochemistry reveals integrin expression in intracranial tumors derived from both  $\beta 8^{\text{high}}$  (E, G) and  $\beta 8^{\text{low}}$  (F, H) GBM cells. Panels G and H are higher magnification images of boxed areas in panels E and F. Scale bars in C-F are 50  $\mu\text{m}$  and G, H are 20  $\mu\text{m}$ . **(I);** FACS-based fractionation of  $\beta 8^{\text{high}}$  and  $\beta 8^{\text{low}}$  GBM cells from the HBT14 xenograft. **(J, K);** Both  $\beta 8^{\text{high}}$  GBM (J) and  $\beta 8^{\text{low}}$  GBM cells (K) that form spheroids in culture show robust integrin expression, as determined by FACS.

**Supplemental Figure 7. Cerebral blood vessel co-option in xenograft tumors. (A);** GFP-expressing  $\beta 8^{\text{WT}}$  GSCs were intracranially implanted into the mouse brain. One month later sections were immunofluorescently labeled with anti-GFP and anti-CD31 antibodies, revealing juxtaposition between tumor cells and cerebral blood vessels. **(B);** TGF $\beta$ 1 ELISA from freshly sorted  $\beta 8^{\text{high}}$  and  $\beta 8^{\text{low}}$  GSCs (HBT51), revealing no statistically significant differences in TGF $\beta$ 1 protein levels. **(C);** VEGF-A ELISA from freshly sorted  $\beta 8^{\text{high}}$  and  $\beta 8^{\text{low}}$  GSCs (HBT51), revealing lack of integrin-dependent differences in VEGF-A protein levels. **(D, E);** Analysis of the Mouse Brain RNA-Seq database reveals that vascular endothelial cells and microglia in the brain are the major sources of *tgfr2* (D) and *tgfb1* (E). **(F);** Differential expression of *ITGAV*, *ITGB8* and *TGFBR2* mRNAs in various tumor regions based on analysis of the IVY GBM database.

**Supplemental Figure 8. FACS-based quantitation of  $\alpha v$  integrin and CD133 expression in cultured GBM spheroids. (A-C);** Unfractionated tumor cells from three different GBM spheroid cultures were analyzed for  $\alpha v$  integrin and CD133 expression. Note that the majority of GBM cells express  $\alpha v$  integrin, but only a fraction of those cells also express CD133.

**Supplemental Figure 9. RNAi-mediated silencing of ITGB8 in high passage GSCs does not inhibit tumorigenesis in vivo. (A, B);** Passaged GBM cells were infected with lentiviruses expressing GFP and non-targeting (NT) shRNAs or shRNAs targeting ITGB8 (A) or ITGAV (B). Immunoblot analysis showing diminished integrin protein expression in cells integrin shRNAs. **(C-H);** Passaged GBM cells were infected with lentiviruses expressing NT shRNAs (C, D) or shRNAs targeting ITGB8 (E, F) or ITGAV (G, H) and injected into the brain. Coronal sections through the brain reveal GFP-expressing tumors (C, E G). H&E staining of fixed sections reveals intracranial tumors in mice injected with all cell types (D, F, H). **(I);** ITGB8 mRNA levels were quantified by RT-PCR in three different high passage GBM spheroids (GSC2, GSC11 and GSC23). Spheroids were grown in serum-free media or were induced to differentiate by serum exposure. Note that differentiation correlates with increased ITGB8 levels in the spheroid samples.

**Supplemental Figure 10. Targeting ITGB8 in high passage GSCs using Crispr-Cas9 methods does not block tumorigenesis in vivo. (A);** Lysates from passaged GSCs (GSC11) infected with three different lentiviruses expressing GFP, Cas9 and gDNAs targeting ITGB8 were immunoblotted for  $\beta 8$  integrin protein. **(B);** A PCR-based strategy was used to identify Crispr/Cas9-induced mismatch mutations in ITGB8 based on heteroduplex formation. Note that heteroduplexes are detected with both gDNAs that target ITGB8. **(C);** Mismatch mutations

leading to heteroduplexes are not detected in three putative off-target genes, as determined with the Surveyor Mutation Detection Kit. **(D, E)**; Primary GBM cells infected with lentiviruses expressing Cas9 or Cas9 and gDNAs targeting ITGB8 were intracranially injected into the striatum of NOD-SCID mice. Note that GBM cells expressing  $\beta 8$  integrin or lacking  $\beta 8$  integrin generate malignant tumors in vivo. H&E-stained brain sections reveal diffuse tumors.

**Supplemental Figure 11.  $\beta 8$  integrin regulates cell cycle gene expression in GSCs. (A, B);**  $\beta 8^{\text{high}}$  and  $\beta 8^{\text{low}}$  primary tumor cells were fractionated from three different freshly resected primary human GBM samples and analyzed by RNA sequencing. Shown is a heat map listing cell cycle-related genes that are differentially regulated in fractionated GBM cells.

**Supplemental Figure 12. Summary of  $\beta 8$  integrin-dependent pathways in fractionated GBM cells based on whole transcriptome sequencing.** NES pathway analysis of  $\beta 8$  integrin-dependent pathways that are elevated in  $\beta 8^{\text{high}}$  GBM cells.

**Supplemental Figure 13. Analysis of  $\beta 8$  integrin-dependent pathways in fractionated GBM cells. (A-C);** Heat maps showing mRNAs upregulated in  $\beta 8^{\text{high}}$  GBM cells in pathways related to mismatch repair (A), homologous recombination (B) and oocyte meiosis (C).

**Supplemental Table 1. Summary of tumor initiation in mice intracranially injected with  $\beta 8^{\text{high}}$  and  $\beta 8^{\text{low}}$  GBM cells.** Shown are (i) numbers of GBM cells injected per animal, (ii) weeks allowed for tumor initiation and progression in vivo, and (iii) total numbers of mice injected with each cell type that developed tumors.

**Supplemental Table 2. Summary of expression signatures for gene sets that are enriched in  $\beta 8^{\text{high}}$  GBM cells based on KEGG pathway analyses.**

**Supplemental Table 3. Summary of expression signatures for gene sets that are enriched in  $\beta 8^{\text{low}}$  GBM cells based on KEGG pathway analyses.**

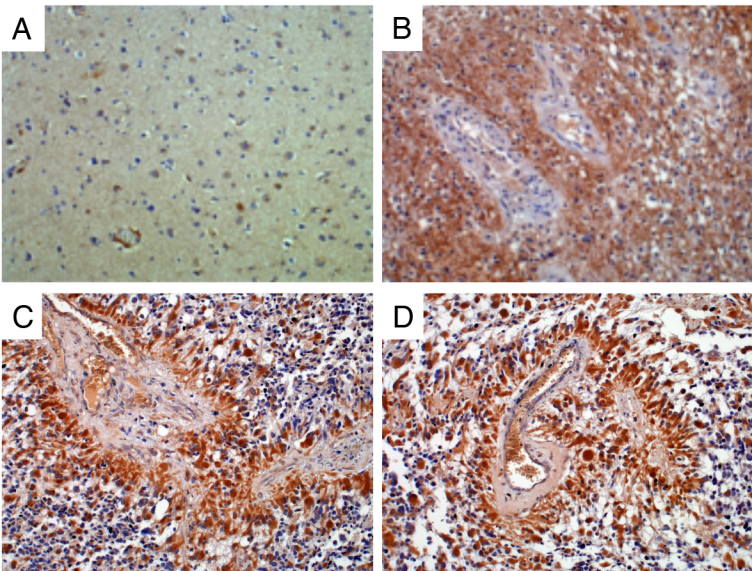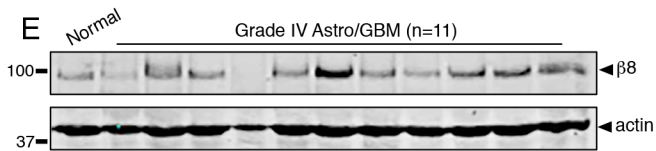

A

| Sample | % $\beta 8^{\text{high}}$ |
|--------|---------------------------|
| 9      | 61                        |
| 14     | 13.3                      |
| 19     | 0.67                      |
| 20     | 0.1                       |
| 21     | 2.0                       |
| 24     | 19.5                      |
| 25     | 6.34                      |
| 27     | 0.15                      |
| 28     | 22.3                      |
| 29     | 0.3                       |
| 30     | 71.0                      |
| 31     | 0                         |
| 32     | 52.6                      |
| 33     | 4.3                       |
| 34     | 0.5                       |
| 36     | 51.2                      |
| 37     | 0.3                       |
| 38     | 52.6                      |
| 40     | 11.3                      |
| 41     | 11.8                      |
| 42     | 24.4                      |
| 44     | 11.0                      |
| 45     | 62.9                      |
| 51     | 21.1                      |
| 52     | 50.1                      |

B

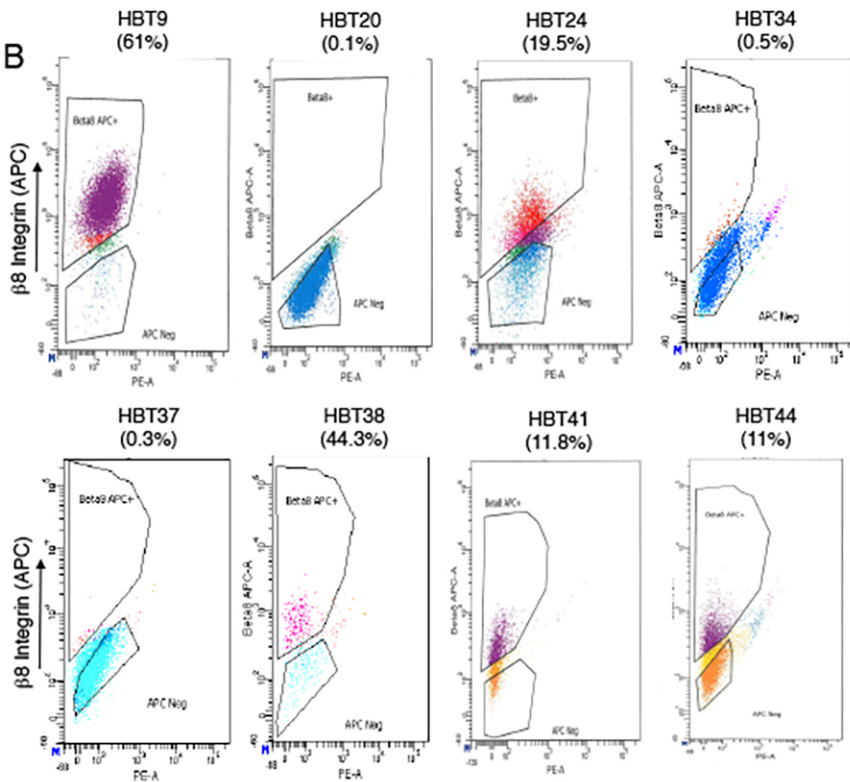



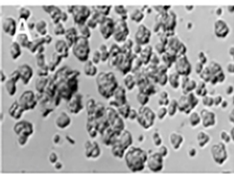

Control IgG

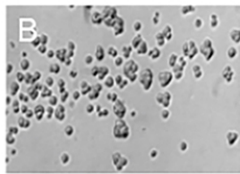

Anti-β8 Integrin

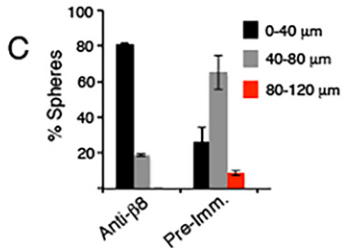

**D**

| MGH26CSC | MGH26FCS | MGH28CSC | MGH28FCS | MGH31CSC | MGH31FCS |              |
|----------|----------|----------|----------|----------|----------|--------------|
| 1.794    | -6.671   | 0.893    | -3.815   | 0.185    | -0.453   | ITGB8 Levels |
| +++      | +        | +++      | +        | +++      | +        | Tumor        |

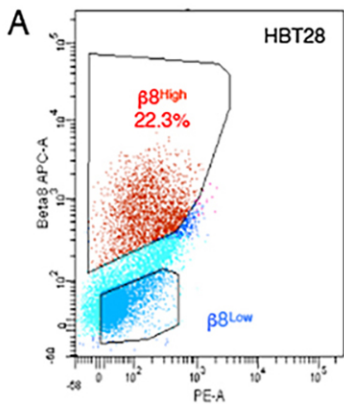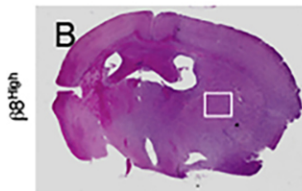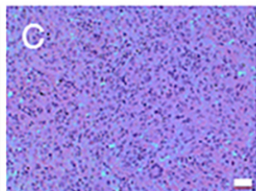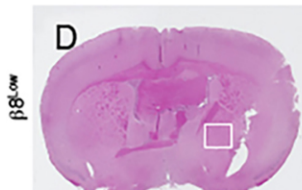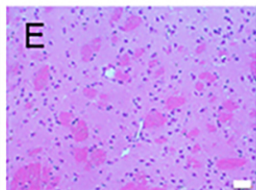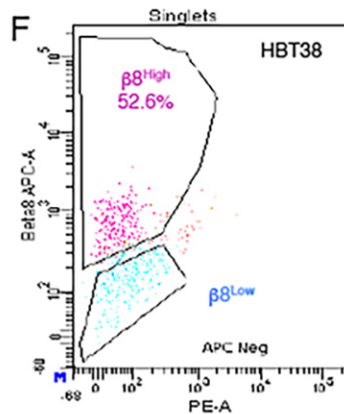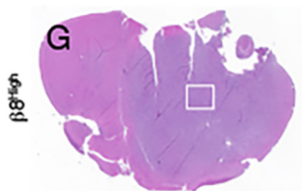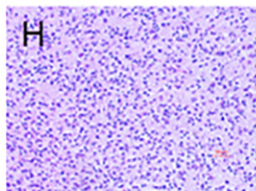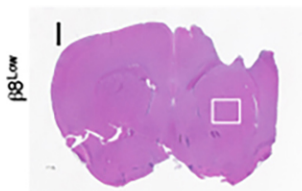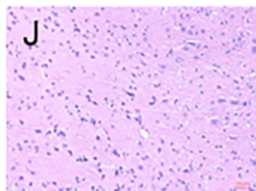

HBT28

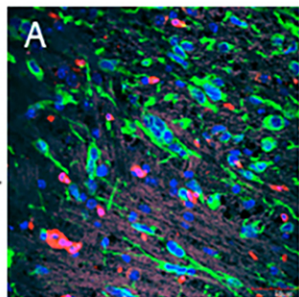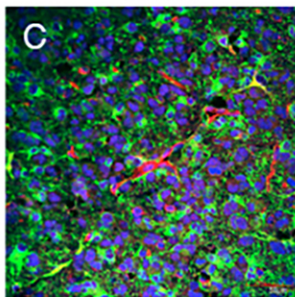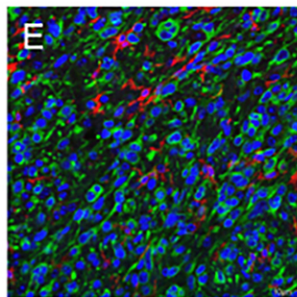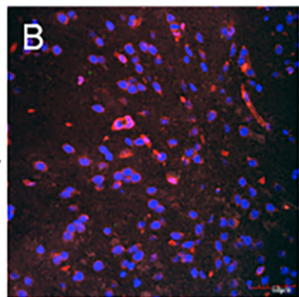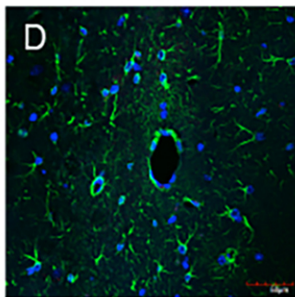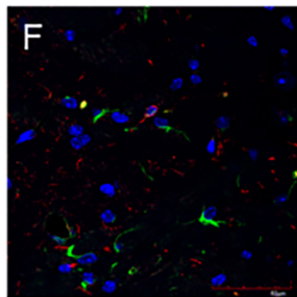

Vimentin Laminin

GFAP Nestin

Vimentin Iba1

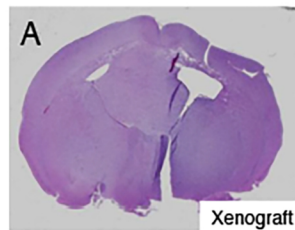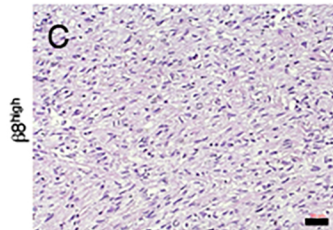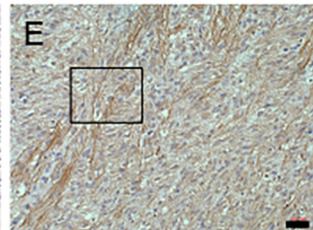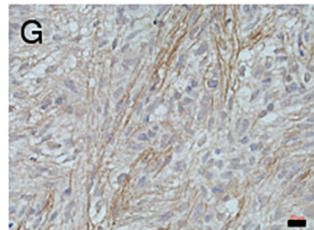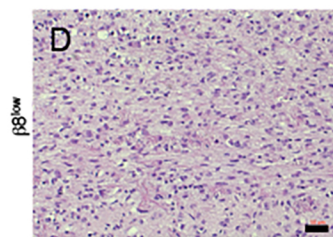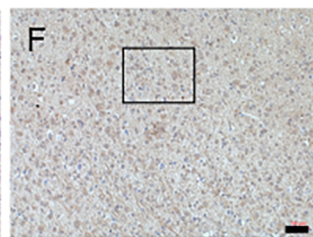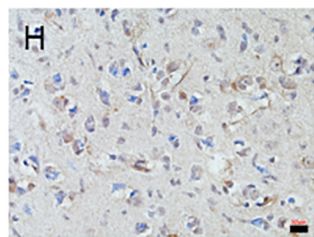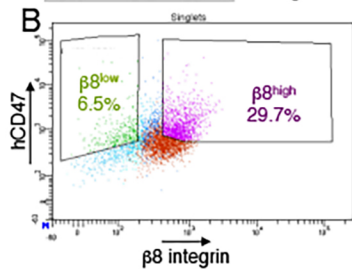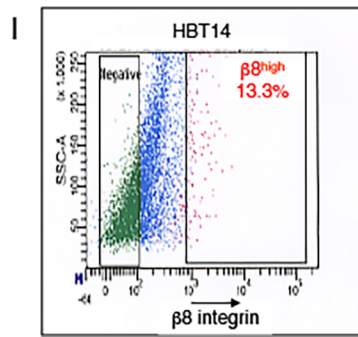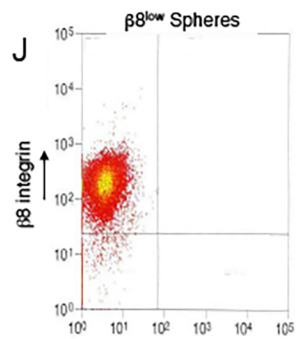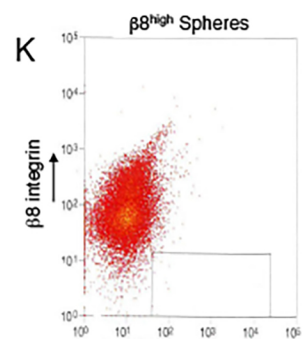

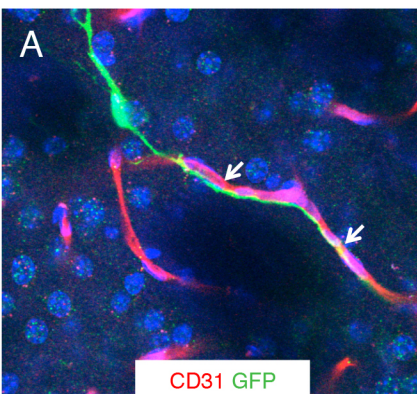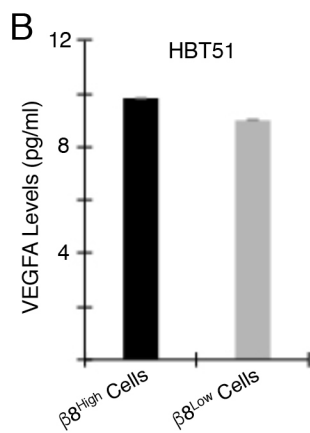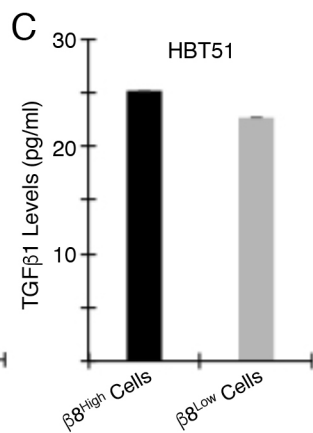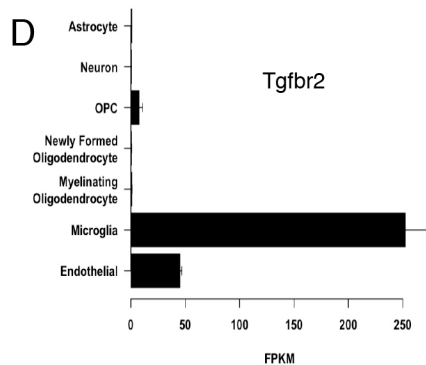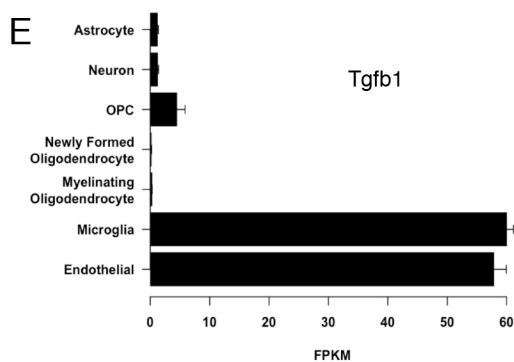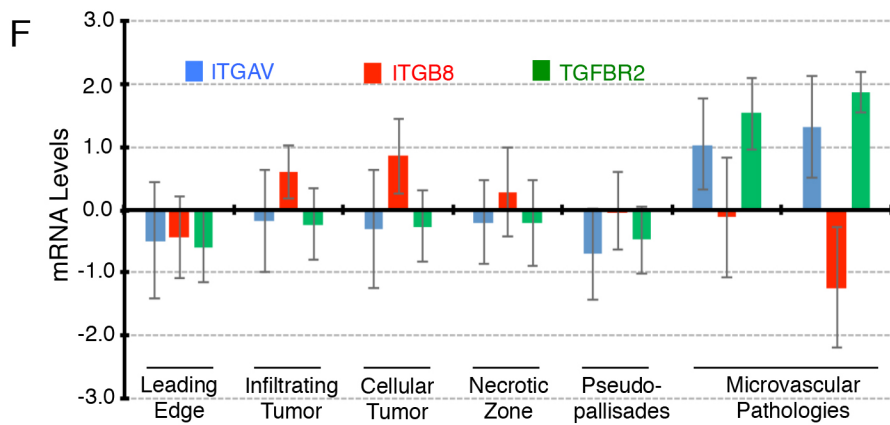

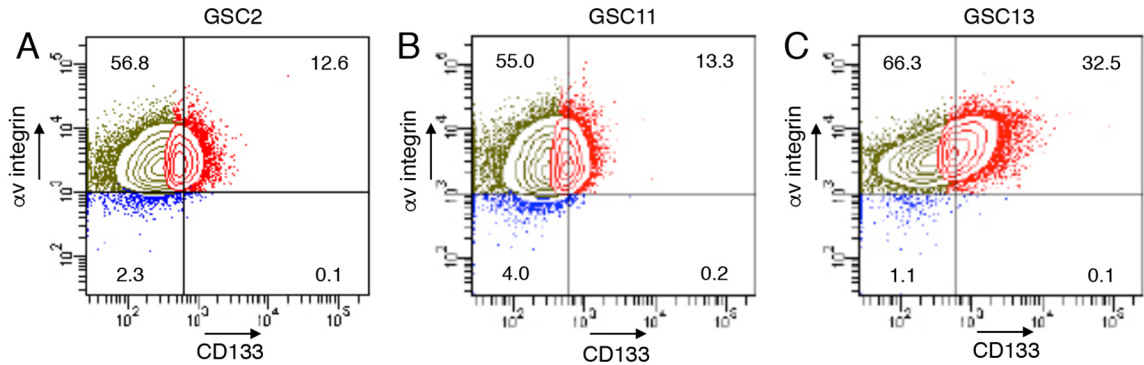

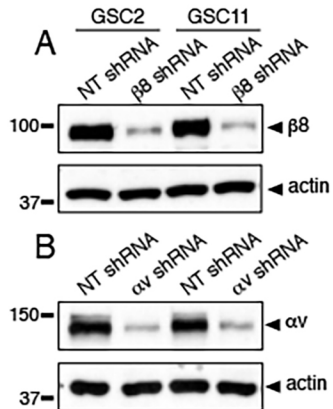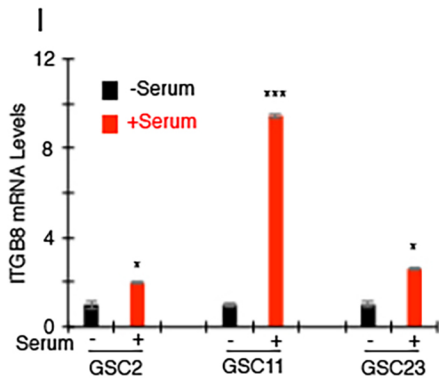

NT shRNA

 $\beta 8$  shRNA $\alpha v$  shRNA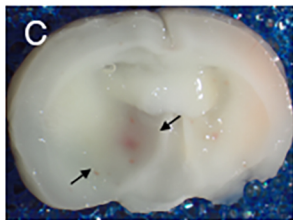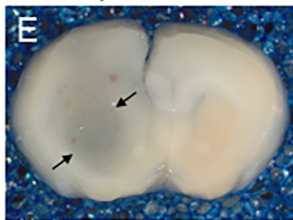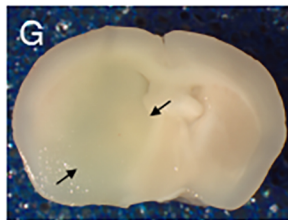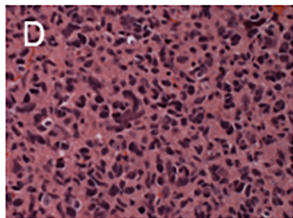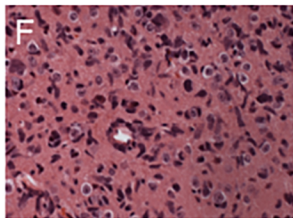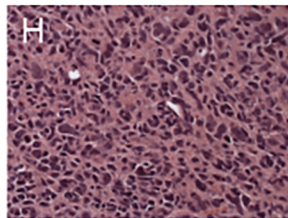

GSC11

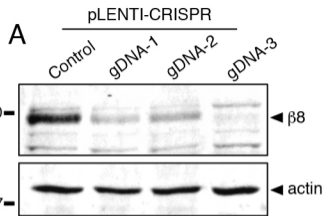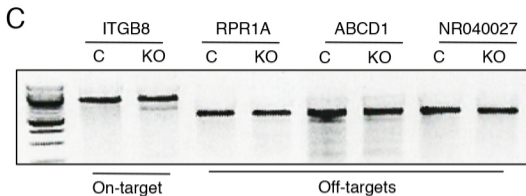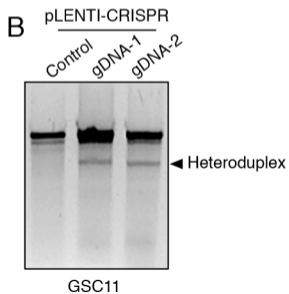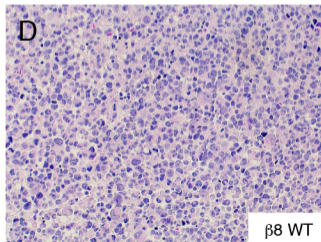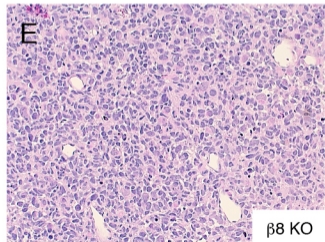

GSC11



A

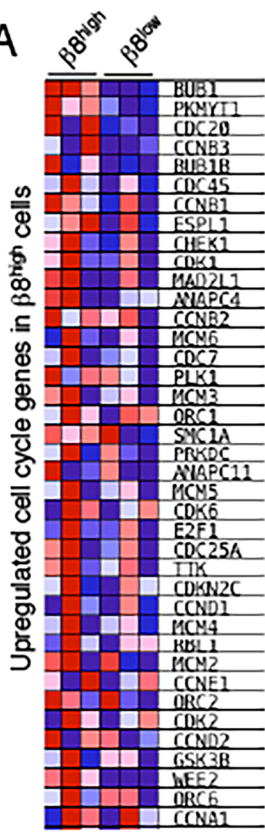

B

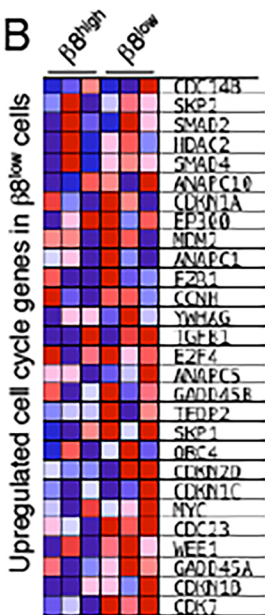

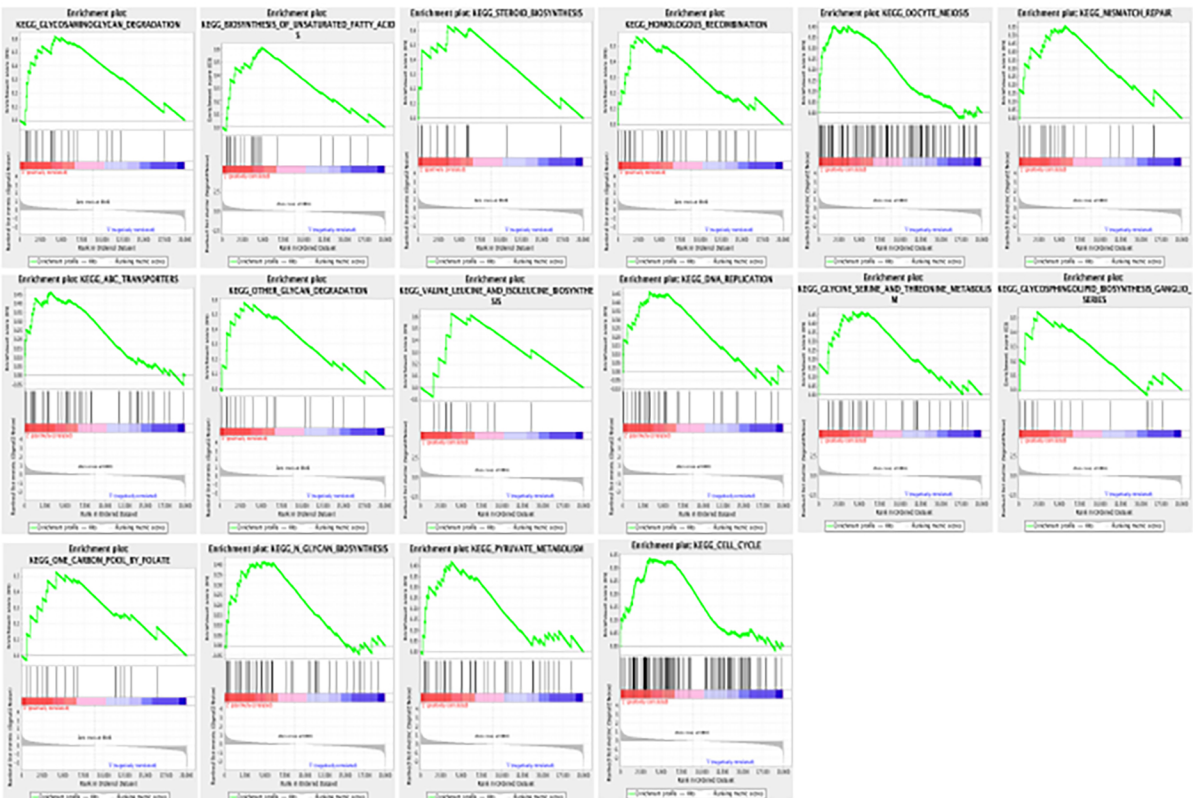

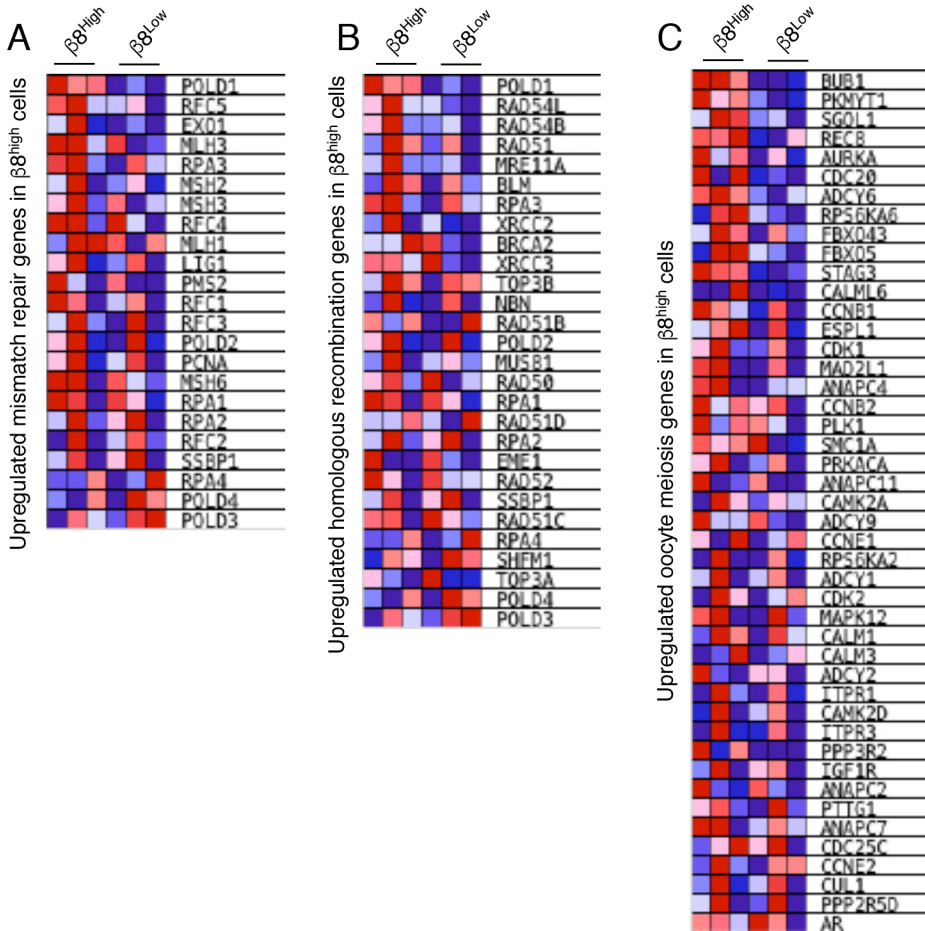

Guerrero et al., Supplemental Table 1

| Sample #      | # Cells Injected<br>(x 10 <sup>3</sup> ) | Time In Vivo<br>(weeks ) | Tumor Incidence         |                        |
|---------------|------------------------------------------|--------------------------|-------------------------|------------------------|
|               |                                          |                          | $\beta 8^{\text{high}}$ | $\beta 8^{\text{low}}$ |
| 20            | 200                                      | 25                       | 3/3                     | 1/3                    |
| 21            | 15                                       | 16                       | 3/3                     | 1/2                    |
| 28            | 60                                       | 18                       | 4/4                     | 0/4                    |
| 32            | 100                                      | 15                       | 4/4                     | 3/3                    |
| 34            | 45                                       | 31                       | 1/4                     | 0/4                    |
| 37            | 20                                       | 24                       | 4/4                     | 2/4                    |
| 38            | 12.5                                     | 19                       | 4/4                     | 1/4                    |
| 44            | 30                                       | 18                       | 1/4                     | 0/4                    |
| <b>Totals</b> |                                          |                          | <b>24/30<br/>80%</b>    | <b>8/28<br/>29%</b>    |

Guerrero et al., Supplemental Table 2

| BIOLOGICAL PROCESS                            | ES       | NES      | p-val    | FDR q-val  |
|-----------------------------------------------|----------|----------|----------|------------|
| GLYCOSAMINOGLYCAN DEGRADATION                 | 0.617334 | 1.8046   | 0.002315 | 0.12597813 |
| BIOSYNTHESIS OF UNSATURATED FATTY ACIDS       | 0.612531 | 1.774237 | 0.004706 | 0.09057741 |
| STEROID BIOSYNTHESIS                          | 0.633764 | 1.73531  | 0.007143 | 0.09479308 |
| HOMOLOGOUS RECOMBINATION                      | 0.56077  | 1.729852 | 0.007614 | 0.07370157 |
| OOCYTE MEIOSIS                                | 0.404296 | 1.637817 | 0        | 0.13774051 |
| MISMATCH REPAIR                               | 0.556747 | 1.627734 | 0.014286 | 0.12462507 |
| ABC TRANSPORTERS                              | 0.46528  | 1.586172 | 0.007317 | 0.15195142 |
| OTHER GLYCAN DEGRADATION                      | 0.579413 | 1.586012 | 0.035714 | 0.13337873 |
| VALINE LEUCINE AND ISOLEUCINE BIOSYNTHESIS    | 0.627655 | 1.528212 | 0.058427 | 0.18170257 |
| DNA REPLICATION                               | 0.463349 | 1.49435  | 0.023697 | 0.21051766 |
| GLYCINE SERINE AND THREONINE METABOLISM       | 0.465651 | 1.474975 | 0.036408 | 0.2204914  |
| GLYCOSPHINGOLIPID BIOSYNTHESIS GANGLIO SERIES | 0.543044 | 1.463085 | 0.065315 | 0.21945165 |
| ONE CARBON POOL BY FOLATE                     | 0.523933 | 1.434787 | 0.06982  | 0.24705881 |
| N GLYCAN BIOSYNTHESIS                         | 0.415028 | 1.43296  | 0.036058 | 0.2333169  |
| PYRUVATE METABOLISM                           | 0.420752 | 1.419591 | 0.040302 | 0.23732561 |
| CELL CYCLE                                    | 0.338695 | 1.405206 | 0.010471 | 0.2458584  |

## Guerrero et al., Supplemental Table 3

| Biological Process                           | ES       | NES      | NOM p-val | FDR q-val |
|----------------------------------------------|----------|----------|-----------|-----------|
| RIBOSOME                                     | -0.59058 | -2.2274  | 0         | 0         |
| LEISHMANIA INFECTION                         | -0.59384 | -2.1636  | 0         | 0         |
| HEMATOPOIETIC CELL LINEAGE                   | -0.55852 | -2.05423 | 0         | 6.01E-04  |
| GRAFT VERSUS HOST DISEASE                    | -0.59814 | -1.95069 | 0         | 0.002462  |
| CYTOKINE CYTOKINE RECEPTOR INTERACTION       | -0.43419 | -1.87246 | 0         | 0.005209  |
| ALLOGRAFT REJECTION                          | -0.58478 | -1.82833 | 0         | 0.008587  |
| SPLICEOSOME                                  | -0.46287 | -1.80865 | 0         | 0.009783  |
| ASTHMA                                       | -0.6017  | -1.78989 | 0         | 0.011664  |
| B CELL RECEPTOR SIGNALING PATHWAY            | -0.48902 | -1.78491 | 0         | 0.010856  |
| PENTOSE AND GLUCURONATE INTERCONVERSIONS     | -0.59791 | -1.76221 | 0.005128  | 0.013619  |
| AUTOIMMUNE THYROID DISEASE                   | -0.5207  | -1.7602  | 0         | 0.012802  |
| PORPHYRIN AND CHLOROPHYLL METABOLISM         | -0.53807 | -1.75825 | 0         | 0.012188  |
| CHEMOKINE SIGNALING PATHWAY                  | -0.42533 | -1.75817 | 0         | 0.01125   |
| SNARE INTERACTIONS IN VESICULAR TRANSPORT    | -0.54424 | -1.74407 | 0.001695  | 0.012114  |
| TYPE 1 DIABETES MELLITUS                     | -0.53403 | -1.74319 | 0.001701  | 0.011429  |
| DRUG METABOLISM OTHER ENZYMES                | -0.51725 | -1.74015 | 0         | 0.010998  |
| CYTOSOLIC DNA SENSING PATHWAY                | -0.50249 | -1.73369 | 0         | 0.011357  |
| BASAL TRANSCRIPTION FACTORS                  | -0.54344 | -1.70889 | 0.005263  | 0.014423  |
| TOLL LIKE RECEPTOR SIGNALING PATHWAY         | -0.44976 | -1.70555 | 0.001613  | 0.014033  |
| STEROID HORMONE BIOSYNTHESIS                 | -0.49159 | -1.66504 | 0.00335   | 0.021253  |
| RNA POLYMERASE                               | -0.54982 | -1.66416 | 0.010772  | 0.020369  |
| FC GAMMA R MEDIATED PHAGOCYTOSIS             | -0.43888 | -1.65046 | 0.001653  | 0.022273  |
| ASCORBATE AND ALDARATE METABOLISM            | -0.56659 | -1.64888 | 0.015929  | 0.021769  |
| ACUTE MYELOID LEUKEMIA                       | -0.47226 | -1.64734 | 0         | 0.021357  |
| JAK STAT SIGNALING PATHWAY                   | -0.40298 | -1.62744 | 0.001555  | 0.026172  |
| CIRCADIAN RHYTHM MAMMAL                      | -0.6723  | -1.61299 | 0.005181  | 0.028561  |
| METABOLISM OF XENOBIOTICS BY CYTOCHROME P450 | -0.44766 | -1.59641 | 0.00495   | 0.032104  |
| T CELL RECEPTOR SIGNALING PATHWAY            | -0.40768 | -1.55512 | 0.003252  | 0.04578   |
| INTESTINAL IMMUNE NETWORK FOR IGA PRODUCTION | -0.46582 | -1.54982 | 0.012259  | 0.04617   |
| RNA DEGRADATION                              | -0.44053 | -1.53839 | 0.011272  | 0.049688  |
| NOD LIKE RECEPTOR SIGNALING PATHWAY          | -0.43527 | -1.51044 | 0.010033  | 0.062338  |
| PROTEASOME                                   | -0.45675 | -1.49261 | 0.031879  | 0.071017  |
| SYSTEMIC LUPUS ERYTHEMATOSUS                 | -0.38151 | -1.49216 | 0.009188  | 0.06914   |
| NATURAL KILLER CELL MEDIATED CYTOTOXICITY    | -0.37149 | -1.47024 | 0.007776  | 0.080483  |
| NITROGEN METABOLISM                          | -0.51065 | -1.44961 | 0.057793  | 0.091849  |
| IRG 1 LIKE RECEPTOR SIGNALING PATHWAY        | -0.3981  | -1.41841 | 0.032258  | 0.11383   |
| PRION DISEASES                               | -0.45442 | -1.41137 | 0.053601  | 0.117182  |
| REGULATION OF AUTOPHAGY                      | -0.44886 | -1.395   | 0.07438   | 0.1286    |
| THYROID CANCER                               | -0.45375 | -1.38163 | 0.062395  | 0.137798  |
| MAPK SIGNALING PATHWAY                       | -0.32236 | -1.37936 | 0.07057   | 0.136661  |
| ENDOCYTOSIS                                  | -0.33608 | -1.37905 | 0.02      | 0.133639  |
| ADIPOCYTOKINE SIGNALING PATHWAY              | -0.37923 | -1.35193 | 0.05802   | 0.158664  |
| CHRONIC MYELOID LEUKEMIA                     | -0.3669  | -1.32842 | 0.059801  | 0.182814  |
| PRIMARY IMMUNODEFICIENCY                     | -0.41951 | -1.31538 | 0.104235  | 0.195698  |
| APOPTOSIS                                    | -0.35377 | -1.31332 | 0.063518  | 0.193618  |
